# Supplementary material for: Promoter DNA methylation patterns in oral, laryngeal and oropharyngeal anatomical regions are associated with tumor differentiation, nodal involvement and survival
Source: PubMed Central journal article supplement — Oncol Lett. 2024 Jan 8;27(3):89. doi: 10.3892/ol.2024.14223 (PMC10804364; doi:10.3892/ol.2024.14223), 2024-01-08
Supplement: Supplementary_Data1.pdf [file Supplementary_Data1.pdf]

Figure S1. MeDIP enrichment analysis. All samples were subjected to a quantitative PCR assay using specific and non-specific primers for DNA methylation. Non-specific primers analyzed known global methylated and unmethylated genes. Specific primers for DNA methylation enrichment analysis included TSH2B, positive methylation control and GAPDH as a negative methylation control. meDNA, methylated DNA; un/ume, unmethylated; MeDIP, methylated DNA immunoprecipitation.

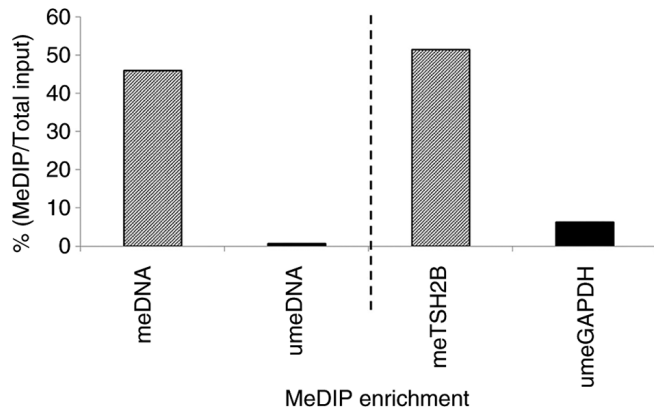

Figure S2. Venn diagram shows differentially methylated regions in head and neck squamous cell carcinoma tumor samples distributed by anatomical subsite.

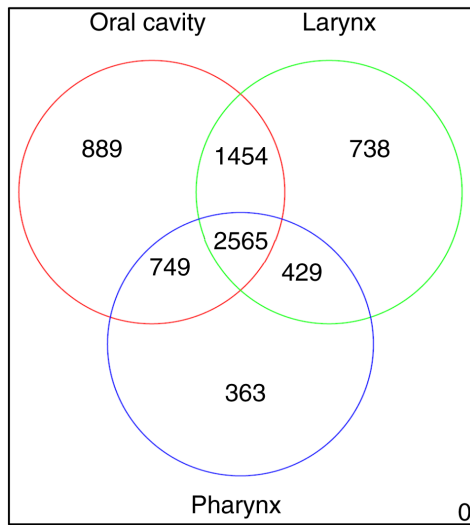

Figure S3. Concurrent aberrant DNA methylation of candidate genes in HNSCC vs normal samples. The red, blue, ivory, green, black and turquoise bars represents number of samples with five, four, three, two, one and zero candidate genes methylated, respectively. HNSCC, head and neck squamous cell carcinoma.

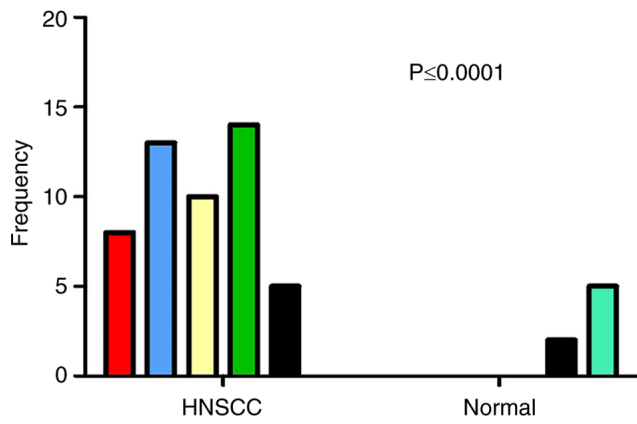

Data S1. Bioinformatics pipeline for peak discovery algorithm. Detailed bioinformatics pipeline or peak discovery algorithm using CHARM bioinformatics package within the R statistical programming.

# Promoter DNA methylation patterns in oral, laryngeal, and oropharyngeal anatomical regions pipeline analysis

**Nitesh Turaga**

## Pipeline Description

1. Separate files/Samples into Cancer and Control
2. Analyze Transcription start sites and CpG Islands separately, ignore other features.
3. Transcription Start Sites

### For one status

1. Get the frequency of genes within each sample.
2. Among all the samples, select for genes with frequency greater than 20%(based on the sample size).
3. Re-annotate with the peaks file for the selected genes with high fre

### Between status types

1. Get common genes between both status types (based on ncbi gene id - no duplicates).
2. Remove from either status, making them mutually exclusive (based on gene symbol).

## Set working directory

```
rm(list = ls(all=T))
mypath = "~/Documents/TestRun/Charm Analysis/charmData/Nimblegen_Originals/Bianca_Project/Peaks_Files/"
setwd(mypath)
library(plyr)
library(BiocGenerics)
```

```
## Loading required package: parallel
##
## Attaching package: 'BiocGenerics'
##
## The following objects are masked from 'package:parallel':
##
##   clusterApply, clusterApplyLB, clusterCall, clusterEvalQ,
##   clusterExport, clusterMap, parApply, parCapply, parLapply,
##   parLapplyLB, parRapply, parSapply, parSapplyLB
##
## The following object is masked from 'package:stats':
##
##   xtabs
##
## The following objects are masked from 'package:base':
##
##   anyDuplicated, append, as.data.frame, as.vector, cbind,
##   colnames, duplicated, eval, evalq, Filter, Find, get,
##   intersect, is.unsorted, lapply, Map, mapply, match, mget,
##   order, paste, pmax, pmax.int, pmin, pmin.int, Position, rank,
##   rbind, Reduce, rep.int, rownames, sapply, setdiff, sort,
##   table, tapply, union, unique, unlist
```

# Pipeline Steps

## Initialization step

```
# Preprocess for easy file reading. Make lists
files.control = list.files(file.path(mypath,"control"),pattern = ".txt",full.names=T)
files.cancer = list.files(file.path(mypath,"cancer"),pattern = ".txt",full.names=T)
```

# Read in each sample for from status

```
# Select for TSS within each sample read.sample =
function(filename,feature) {
  f = read.csv(as.character(filename),sep="\t",comment.char = "#") f =
  f[f$FEATURE_TRACK == feature,]
  f = f[f$Peaks > 1.999,] # Peaks cutoff return(f)
}

gene.frequency.in.status = function(list.of.files,feature) { f =

read.sample(list.of.files[1],feature)
f.gene = data.frame(table(as.character(f$Name))) f.gene$sample =
gsub(".+/", "",list.of.files[1])

for (i in 2:length(list.of.files)) {
  f = read.sample(list.of.files[i],feature)
  f.next.gene = data.frame(table(as.character(f$Name))) f.next.gene$sample =
  gsub(".+/", "",list.of.files[i]) f.gene = rbind(f.gene,f.next.gene)
}
# get
overall.f.gene = data.frame(table(f.gene$Var1)) cutoff =
round((20/100)*length(list.of.files))
overall.f.gene = overall.f.gene[overall.f.gene$Freq>cutoff,]

return(overall.f.gene)
}

annotate = function(gene.list,list.of.files){
  f = read.sample(list.of.files[1], feature = "transcription_start_site") f.genes = f[which(gene.list %in%
f$Name),] #####
# use this only for controls
f.genes = f.genes[,c("DATA_INDEX","CHROMOSOME","DATA_START","DATA_END","Peaks","FEATURE_TRACK",
"FEATURE_STRAND","FEATURE_START","FEATURE_END","SHORTEST_DISTANCE_FROM_FEATURE_TO_DATA_POINT
,CENTER_TO_CENTER_DISTANCE_FROM_FEATURE_TO_DATA_POINT","ncbi_gene_id"
,"Name","description","synonyms")]
#####
for(i in 2:length(list.of.files)){
  f.next = read.sample(list.of.files[i], feature = "transcription_start_site") f.next.genes = f.next[which(gene.list %in%
f.next$Name),] #####
# Use this only for controls
```

```

f.next.genes = f.next.genes[,c("DATA_INDEX", "CHROMOSOME", "DATA_START", "DATA_END", "Peaks", "FEATURE_TR
ACK",
    "FEATURE_STRAND", "FEATURE_START", "FEATURE_END", "SHORTEST_DISTANCE_FROM_FEATURE_TO_DATA_PO
INT"
    , "CENTER_TO_CENTER_DISTANCE_FROM_FEATURE_TO_DATA_POINT", "ncbi_gene_id"
    , "Name", "description", "synonyms")]
#####
f.genes = rbind(f.genes, f.next.genes)
}
return(f.genes)
}

```

```

# Get overall.genes over frequency in both cancer and control
cancer.genes = gene.frequency.in.status(files.cancer, feature = "transcription_start_site")
normal.genes = gene.frequency.in.status(files.control, feature = "transcription_start_site")

# Annotate
cancer.list = cancer.genes$Var1
normal.list = normal.genes$Var1
cancer.probes.with.high.freq.genes = annotate(cancer.list, files.cancer)
control.probes.with.high.freq.genes = annotate(normal.list, files.control)

# Get common genes
cancer.no.dup = subset(cancer.probes.with.high.freq.genes, !duplicated(cancer.probes.with.high.freq.genes$ncb
i_gene_id))
table(cancer.no.dup$CHROMOSOME)

```

```

##
##      chr1  chr1_random      chr10      chr11      chr12
##      1987           0         743       1254       980
##      chr13 chr13_random      chr14      chr15      chr16
##      317           0         635         651       783
##      chr17 chr17_random      chr18      chr19 chr19_random
##      1087           9         264       1169           5
##      chr2      chr20      chr21 chr21_random      chr22
##      1193         478         223           0         390
##      chr3  chr3_random      chr4  chr4_random      chr5
##      1043           0         707           0         846
##      chr6      chr7      chr8      chr9      chrX
##      1009         901         646         767         727
##  chrX_random      chrY  chr2_random  chr5_random  chr16_random
##           0         82           0           0           0
##  chr6_random  chr15_random  chr9_random  chr11_random  chr22_random
##           0           0           1           0           0

```

```
head(cancer.no.dup)
```

```

## DATA_INDEX CHROMOSOME DATA_START DATA_END Peaks FEATURE_TRACK
## 1 66098 chr1 883773 883928 2.689 transcription_start_site
## 2 66098 chr1 883773 883928 2.689 transcription_start_site
## 4 66099 chr1 888768 889017 2.682 transcription_start_site
## 5 3 chr1 936559 937295 3.109 transcription_start_site
## 6 57426 chr1 1099854 1099983 2.590 transcription_start_site
## 8 8 chr1 1159043 1159794 4.135 transcription_start_site
## FEATURE_STRAND FEATURE_START FEATURE_END
## 1 - 884542 884542
## 2 + 885829 885829
## 4 + 891739 891739
## 5 + 938709 938709
## 6 + 1104939 1104939
## 8 - 1157310 1157310
## SHORTEST_DISTANCE_FROM_FEATURE_TO_DATA_POINT
## 1 614
## 2 -1901
## 4 -2722
## 5 -1414
## 6 -4956
## 8 -1733
## CENTER_TO_CENTER_DISTANCE_FROM_FEATURE_TO_DATA_POINT ncbi_gene_id
## 1 691 26155
## 2 -1978 339451
## 4 -2846 84069
## 5 -1782 9636
## 6 -5020 254173
## 8 -2108 51150
## Name description
## 1 NOC2L nucleolar complex associated 2 homolog (S. cerevisiae)
## 2 KLHL17 kelch-like 17 (Drosophila)
## 4 PLEKHN1 pleckstrin homology domain containing, family N member 1
## 5 ISG15 ISG15 ubiquitin-like modifier
## 6 TTLL10 tubulin tyrosine ligase-like family, member 10
## 8 SDF4 stromal cell derived factor 4
## synonyms
## 1 DKFZp564C186
## 2 RP11-54O7.6
## 4 DKFZp434H2010
## 5 G1P2
## 6 FLJ36119
## 8 Cab45

```

```
dim(cancer.no.dup)
```

```
## [1] 18897 15
```

```
cancer.no.dup[grep("SMAD1",cancer.no.dup$Name),]
```



```

##      DATA_INDEX CHROMOSOME DATA_START DATA_END Peaks
## 41592      114921      chr4 146620835 146620995 2.087
##      FEATURE_TRACK FEATURE_STRAND FEATURE_START
##      FEATURE_END
## 41592 transcription_start_site      +      146623406      146623406
##      SHORTEST_DISTANCE_FROM_FEATURE_TO_DATA_POINT
## 41592      -2411
##      CENTER_TO_CENTER_DISTANCE_FROM_FEATURE_TO_DATA_POINT
##      ncbi_gene_id
## 41592      -2496      4086
##      Name      description synonyms
## 41592 SMAD1      family member 1      BSP1
##      SMAD

```

```

normal.no.dup = subset(control.probes.with.high.freq.genes,!duplicated(control.probes.with.high.freq.genes$ncbi_gene_id))
table(normal.no.dup$CHROMOSOME)

```

```

##
##      chr1      chr10      chr11      chr12      chr13
##      1797      472      714      635      234
##      chr14      chr15      chr16      chr17      chr18
##      420      429      370      595      191
##      chr19      chr2      chr20      chr21      chr22
##      262      1095      192      124      116
##      chr3      chr4      chr5      chr6      chr7
##      941      638      653      659      562
##      chr8      chr9      chrX      chrY      chr13_random
##      392      444      284      44      0
##      chr17_random      chr6_random      chrX_random      chr1_random      chr19_random
##      11      1      0      0      0
##      chr21_random      chr3_random      chr5_random      chr9_random
##      0      0      0      1

```

```

head(normal.no.dup)

```

```

## DATA_INDEX CHROMOSOME DATA_START DATA_END Peaks
## 1 32387 chr1 861090 861217 2.157
## 2 32388 chr1 867686 868029 2.482
## 4 32390 chr1 885728 893410 4.064
## 8 32391 chr1 896609 898064 3.055
## 13 32391 chr1 896609 898064 3.055
## 25 32394 chr1 934947 935192 2.295
## FEATURE_TRACK FEATURE_STRAND FEATURE_START
FEATURE_END
## 1 transcription_start_site + 861120 861120
## 2 transcription_start_site + 871145 871145
## 4 transcription_start_site + 895966 895966
## 8 transcription_start_site + 901876 901876
## 13 transcription_start_site - 894679 894679
## 25 transcription_start_site - 935552 935552
## SHORTEST_DISTANCE_FROM_FEATURE_TO_DATA_POINT
## 1 0
## 2 -3116
## 4 -2556
## 8 -3812
## 13 -1930
## 25 360
## CENTER_TO_CENTER_DISTANCE_FROM_FEATURE_TO_DATA_POINT
ncbi_gene_id
## 1 33 148398
## 2 -3287 NA
## 4 -6397 339451
## 8 -4539 84069
## 13 -2657 26155
## 25 482 57801
## Name description
## 1 SAMD11 sterile alpha motif domain containing 11
## 2 cmlpl
## 4 KLHL17 kelch-like 17 (Drosophila)
## 8 PLEKHN1 pleckstrin homology domain containing, family N member 1
## 13 NOC2L nucleolar complex associated 2 homolog (S. cerevisiae)
## 25 HES4 hairy and enhancer of split 4 (Drosophila)
## synonyms
## 1 MGC45873
## 2
## 4 RP11-54O7.6
## 8 DKFZp434H2010
## 13 DKFZp564C186
## 25 bHLHb42

```

```
dim(normal.no.dup)
```

```
## [1] 12276 15
```

```
normal.no.dup[grep("HOXA9",normal.no.dup$Name),]
```

```
## [1] DATA_INDEX
## [2] CHROMOSOME
## [3] DATA_START
## [4] DATA_END
## [5] Peaks
## [6] FEATURE_TRACK
## [7] FEATURE_STRAND
## [8] FEATURE_START
## [9] FEATURE_END
## [10] SHORTEST_DISTANCE_FROM_FEATURE_TO_DATA_POINT
## [11] CENTER_TO_CENTER_DISTANCE_FROM_FEATURE_TO_DATA_POINT
## [12] ncbi_gene_id
## [13] Name
## [14] description
## [15] synonyms
## <0 rows> (or 0-length row.names)
```

```
common_genes = BiocGenerics::intersect(normal.no.dup$Name,cancer.no.dup$Name)
tail(common_genes,100)
```

```
## [1] "KRTAP19-1" "KRTAP19-4" "KRTAP19-5" "KRTAP6-3" "KRTAP6-1"
## [6] "KRTAP20-4" "KRTAP20-2" "KRTAP20-3" "KRTAP21-1" "KRTAP7-1"
## [11] "KRTAP11-1" "KRTAP19-8" "IFNAR2" "DONSON" "CRYZL1"
## [16] "KCNE2" "FAM165B" "KCNE1" "RCAN1" "TTC3"
## [21] "DSCR3" "NCRNA00114" "PSMG1" "LCA5L" "SH3BGR"
## [26] "C21orf88" "FAM3B" "ABCG1" "TFF1" "AGPAT3"
## [31] "TRPM2" "KRTAP10-5" "KRTAP10-11" "KRTAP12-2" "KRTAP12-1"
## [36] "C21orf29" "ITGB2" "C21orf67" "C21orf70" "NCRNA00162"
## [41] "LOC642852" "psiTPTE22" "UFD1L" "CDC45" "ZNF280A"
## [46] "RTDR1" "RAB36" "C22orf43" "SLC2A11" "C22orf13"
## [51] "SNRPD3" "PIWIL3" "HPS4" "SRRD" "TFIP11"
## [56] "TTC28AS" "XBP1" "RFPL1" "ASCC2" "SF3A1"
## [61] "CCDC157" "C22orf27" "RNF185" "LIMK2" "C22orf24"
## [66] "RFPL3S" "SYN3" "TOM1" "MB" "APOL3"
## [71] "MYH9" "TXN2" "EIF3D" "PVALB" "TMPRSS6"
## [76] "PLA2G6" "LOC400927" "JOSD1" "ENTHD1" "GRAP2"
## [81] "TNRC6B" "SLC25A17" "XPNPEP3" "ST13" "ARFGAP3"
## [86] "PACSIN2" "LDOC1L" "NCRNA00207" "SMC1B" "MLC1"
## [91] "MOV10L1" "LMF2" "NCAPH2" "RPL23AP82" "ASMTL"
## [96] "XG" "XGPY2" "ARSE" "NLGN4X" "VCX3A"
```

```
# Exclusive genes from both sets of Cancer and Normal files
cancer.genes.exclusive = cancer.no.dup[!(cancer.no.dup$Name %in% common_genes), ]
dim(cancer.genes.exclusive)
```

```
## [1] 7248 15
```

```
table(cancer.genes.exclusive$CHROMOSOME)
```

```
##
##      chr1  chr1_random  chr10  chr11  chr12
##      307      0      277  559  363
##      chr13 chr13_random  chr14  chr15  chr16
##      95      0      220  230  421
##      chr17 chr17_random  chr18  chr19  chr19_random
##      519      1      81  952  5
##      chr2      chr20  chr21  chr21_random  chr22
##      168      318  116  0  291
##      chr3  chr3_random  chr4  chr4_random  chr5
##      151      0  104  0  229
##      chr6      chr7  chr8  chr9  chrX
##      375      358  261  334  472
##      chrX_random  chrY  chr2_random  chr5_random  chr16_random
##      0      41  0  0  0
##      chr6_random  chr15_random  chr9_random  chr11_random  chr22_random
##      0      0  0  0  0
```

```
cancer.genes.exclusive[grep("CDKN2A",cancer.genes.exclusive$Name),]
```

```
##      DATA_INDEX CHROMOSOME DATA_START DATA_END Peaks
## 71913 116631 chr9 21966746 21967303 3.437
##      FEATURE_TRACK FEATURE_STRAND FEATURE_START
##      FEATURE_END
## 71913 transcription_start_site - 21965038 21965038
##      SHORTEST_DISTANCE_FROM_FEATURE_TO_DATA_POINT
## 71913 -1708
##      CENTER_TO_CENTER_DISTANCE_FROM_FEATURE_TO_DATA_POINT
##      ncbi_gene_id
## 71913 -1986 1029
##      Name
## 71913 CDKN2A description
## 71913 cyclin-dependent kinase inhibitor 2A (melanoma, p16, inhibits CDK4)
##      synonyms
## 71913 ARF
```

```
write.table(cancer.genes.exclusive,file = "objs/cancer.genes.exclusive.txt",sep="\t")
```

```
normal.genes.exclusive = normal.no.dup[!(normal.no.dup$Name %in% common_genes), ]
dim(normal.genes.exclusive)
```

```
## [1] 627 15
```

```
table(normal.genes.exclusive$CHROMOSOME)
```

```
##
##      chr1      chr10      chr11      chr12      chr13
##      118       6        19        18        12
##      chr14     chr15     chr16     chr17     chr18
##      5        8        8        28        8
##      chr19     chr2      chr20     chr21     chr22
##      45       70       32       17       17
##      chr3     chr4     chr5     chr6     chr7
##      49       35       36       26       19
##      chr8     chr9     chrX     chrY     chr13_random
##      7        11       28       4        0
## chr17_random chr6_random chrX_random chr1_random chr19_random
##      1        0        0        0        0
## chr21_random chr3_random chr5_random chr9_random
##      0        0        0        0
```

```
normal.genes.exclusive[grep("SMAD1",normal.genes.exclusive$Name),]
```

```
## [1] DATA_INDEX
## [2] CHROMOSOME
## [3] DATA_START
## [4] DATA_END
## [5] Peaks
## [6] FEATURE_TRACK
## [7] FEATURE_STRAND
## [8] FEATURE_START
## [9] FEATURE_END
## [10] SHORTEST_DISTANCE_FROM_FEATURE_TO_DATA_POINT
## [11] CENTER_TO_CENTER_DISTANCE_FROM_FEATURE_TO_DATA_POINT
## [12] ncbi_gene_id
## [13] Name
## [14] description
## [15] synonyms
## <0 rows> (or 0-length row.names)
```

```
write.table(normal.genes.exclusive,file = "objs/normal.genes.exclusive.txt",sep="\t")
```
