# Supplementary material for: Promoter DNA methylation patterns in oral, laryngeal and oropharyngeal anatomical regions are associated with tumor differentiation, nodal involvement and survival
Source: PubMed Central journal article supplement — Oncol Lett. 2024 Jan 8;27(3):89. doi: 10.3892/ol.2024.14223 (PMC10804364; doi:10.3892/ol.2024.14223), 2024-01-08
Supplement: Supplementary_Data2.pdf [file Supplementary_Data2.pdf]

Table SI. Enrichment of quantitative PCR primer pairs.

| DNA type                       | Primer name                                  | Gene specificity | Amplified locus           | Amplicon length, bp |
|--------------------------------|----------------------------------------------|------------------|---------------------------|---------------------|
| Methylated DNA                 | Methylated DNA control (primer pair no. 1)   | Non-specific     | Chr1:30089133-30089053    | 81                  |
| Unmethylated DNA               | Unmethylated DNA control (primer pair no. 2) | Non-specific     | chr3: 20085460-20085556   | 92                  |
| Gene-specific methylated DNA   | Methylated human DNA region                  | <i>TSH2B</i>     | chr6:25835060-25835229    | 170                 |
| Gene-specific unmethylated DNA | Unmethylated human DNA region                | <i>GAPDH</i>     | chr12:6,513,903-6,513,966 | 64                  |

Table SII. Candidate gene primers and probe sequences for quantitative methylation-specific PCR assay.

| Official Symbol | Gene ID | Forward (5'-3')                 | Probe 6FAM (5'-3')TAMRA            | Reverse (5'-3')             | (Ref.)  |
|-----------------|---------|---------------------------------|------------------------------------|-----------------------------|---------|
| <i>ACTB</i>     | 60      | TGGTGATGGAGGAGGTTTAA<br>TAAGT   | ACCACCACCCAACACACAATAACA<br>AACACA | AACCAATAAAACCTACTCCTCCCTTAA | (36)    |
| <i>CALCA</i>    | 796     | GTTTTGGAAGTATGAGGGTG<br>ACG     | ATTCCGCCAATACACAACAACCAAT<br>AAACG | TTCCCGCCGCTATAAATCG         | (36)    |
| <i>CDHI</i>     | 999     | AATTTTAGGTTAGAGGGTTAT<br>CGCGT  | CGCCACCCGACCTCGCAT                 | TCCCCAAAACGAAACTAACGAC      | (36)    |
| <i>DAPK1</i>    | 1612    | GGATAGTCGGATCGAGTTAA<br>CGTC    | TTCGGTAATTCGTAGCGGTAGGGTT<br>TGG   | CCCTCCCAAACGCCGA            | (36)    |
| <i>SFRP1</i>    | 6422    | GAATTCGTTTCGCGAGGGA             | CCGTCACCGACGCGAAAACCAAT            | AAACGAACCGCACTCGTTACC       | (36)    |
| <i>MAGI2</i>    | 9863    | GCGCGTTATAAGTTTAGGTTT<br>C      | AACTCCCTCCGACCTAAACTCCG            | CTTCTTCAACCTCTATACGAC       | (37-39) |
| <i>PAX1</i>     | 5075    | TCGTTAGGGAGAAAGGAATT<br>TGT     | TTTCGTGCGTTCGCGTTTGGG              | TAAATCCGACGCCCTCCTA         | (40)    |
| <i>PAX5</i>     | 5079    | GCGTAAGAGAGACGAAGGTA<br>AG      | AGAGGTTTCGCGTAGTTTCGTCGG           | ATATTCGCGAACACCTCTACTAC     | (40)    |
| <i>PITX2</i>    | 5308    | GGAGTGACGTGACGTTAGTA<br>GAGATTT | CGCCCGCGCGCCACTATACA               | AACCGCGCAACCGAACT           | (41)    |
| <i>SOCS1</i>    | 8651    | GCGTCGAGTTCGTGGGTATTT           | ACAATTCGCTAACGACTATCGCGC<br>A      | CCGAAACCATCTTCACGCTAA       | (42)    |
| <i>TIMP3</i>    | 7078    | GCGTCGGAGGTTAAGGTTGT<br>T       | AACTCGCTCGCCCGCCGAA                | CTCTCCAAAATTACCGTACGCG      | (43)    |

Table VIII. Common differentially methylated regions across all three head and neck squamous cell carcinoma sub-sites after The Cancer Genome Atlas and UCSC Cancer Genomics Browser confirmation.

| Gene ID        | Peak value | Biological pathway interaction                                                                                                                                                                                                                         |
|----------------|------------|--------------------------------------------------------------------------------------------------------------------------------------------------------------------------------------------------------------------------------------------------------|
| <i>CREB3</i>   | 5.610      | cGMP-PKG signaling pathway, cAMP signaling pathway, PI3K-Akt signaling pathway, AMPK signaling pathway, TNF signaling pathway, thyroid hormone synthesis, alcoholism, viral carcinogenesis, prostate cancer                                            |
| <i>PLCE1</i>   | 5.593      | Inositol phosphate metabolism, metabolic pathways, Ras signaling pathway, Rap1 signaling pathway, calcium signaling pathway, cAMP signaling pathway, phosphatidylinositol signaling system, thyroid hormone signaling pathway, proteoglycans in cancer |
| <i>RAB5C</i>   | 4.928      | Ras signaling pathway, endocytosis, phagosome                                                                                                                                                                                                          |
| <i>PRB2</i>    | 4.875      | Salivary secretion                                                                                                                                                                                                                                     |
| <i>NUTF2</i>   | 4.778      | Protein import into the nucleus                                                                                                                                                                                                                        |
| <i>ZNF628</i>  | 4.589      | Zinc finger protein regulating transcription                                                                                                                                                                                                           |
| <i>GPR31</i>   | 4.567      | G-protein coupled receptor                                                                                                                                                                                                                             |
| <i>PIK3R6</i>  | 4.493      | Produces the lipid second messenger phosphatidylinositol 3,4,5-trisphosphate                                                                                                                                                                           |
| <i>EIF6</i>    | 4.490      | Ribosome biogenesis in eukaryotes                                                                                                                                                                                                                      |
| <i>MTA1</i>    | 4.336      | Downregulated in estrogen receptor <sup>+</sup> breast tumors                                                                                                                                                                                          |
| <i>CHEK2</i>   | 3.937      | Cell cycle, p53 signaling pathway                                                                                                                                                                                                                      |
| <i>NRTN</i>    | 3.823      | Ligand of the TGF- $\beta$ superfamily of proteins                                                                                                                                                                                                     |
| <i>PITPNM2</i> | 3.739      | Membrane-associated phosphatidylinositol transfer domain-containing proteins                                                                                                                                                                           |
| <i>EIF3J</i>   | 3.484      | RNA transport                                                                                                                                                                                                                                          |
| <i>IL34</i>    | 3.459      | Promotes differentiation and viability of monocytes and macrophages                                                                                                                                                                                    |
| <i>DUSP5</i>   | 3.243      | MAPK signaling pathway                                                                                                                                                                                                                                 |
| <i>TOP1</i>    | 3.057      | DNA topoisomerase                                                                                                                                                                                                                                      |
| <i>PRKD1</i>   | 2.991      | Rap1 signaling pathway                                                                                                                                                                                                                                 |
| <i>PGS1</i>    | 2.828      | Glycerophospholipid metabolism, metabolic pathways                                                                                                                                                                                                     |
| <i>RASSF1</i>  | 2.8084     | Ras signaling pathway, Hippo signaling pathway, pathways in cancer, microRNAs in cancer, bladder cancer, non-small cell lung cancer                                                                                                                    |
| <i>CCL13</i>   | 2.766      | Cytokine-cytokine receptor interaction, chemokine signaling pathway, NF- $\kappa$ B signaling pathway                                                                                                                                                  |
| <i>ZNF395</i>  | 2.681      | RNA polymerase II core promoter proximal region sequence-specific DNA binding                                                                                                                                                                          |
| <i>MLH1</i>    | 2.643      | Mismatch repair, pathways in cancer, colorectal and endometrial cancer                                                                                                                                                                                 |
| <i>HOXA9</i>   | 2.583      | Homeobox gene                                                                                                                                                                                                                                          |
| <i>CDKN2A</i>  | 2.3585     | Cell cycle, p53 signaling pathway, pathways in cancer, viral carcinogenesis, microRNAs in cancer, pancreatic cancer, glioma, melanoma, bladder cancer, chronic myeloid leukemia, non-small cell lung cancer                                            |
| <i>DAPK1</i>   | 2.416      | Pathways in cancer, bladder cancer                                                                                                                                                                                                                     |
| <i>FOXI1</i>   | 2.342      | Forkhead family of transcription factors, role in development and embryogenesis                                                                                                                                                                        |
| <i>NOTCH3</i>  | 2.341      | Dorso-ventral axis formation, notch signaling pathway, thyroid hormone signaling pathway, microRNAs in cancer                                                                                                                                          |
| <i>HSBP1</i>   | 2.287      | Heat shock factors                                                                                                                                                                                                                                     |
| <i>HOXA6</i>   | 2.165      | Homeobox gene                                                                                                                                                                                                                                          |
| <i>CHAT</i>    | 2.114      | Glycerophospholipid metabolism, cholinergic synapse                                                                                                                                                                                                    |
| <i>BRAP</i>    | 2.056      | Ras signaling pathway                                                                                                                                                                                                                                  |

Table SIV. Prevalence of aberrant methylation of candidate genes in HNSCC (n=50) and normal samples (n=7).

|              | <i>DAPK1</i> |           |         | <i>CDH1</i> |           |         | <i>PAX1</i> |           |         | <i>CALCA</i> |           |         | <i>TIMP3</i> |           |         |
|--------------|--------------|-----------|---------|-------------|-----------|---------|-------------|-----------|---------|--------------|-----------|---------|--------------|-----------|---------|
|              | HNSCC, n     | Normal, n | P-value | HNSCC, n    | Normal, n | P-value | HNSCC, n    | Normal, n | P-value | HNSCC, n     | Normal, n | P-value | HNSCC, n     | Normal, n | P-value |
| Methylated   | 29           | 0         |         | 25          | 1         |         | 41          | 0         |         | 22           | 0         |         | 38           | 1         |         |
| Unmethylated | 21           | 7         | 0.005   | 25          | 6         | 0.112   | 9           | 7         | <0.001  | 28           | 7         | 0.036   | 12           | 6         | 0.003   |

HNSCC, head and neck squamous cell carcinoma.
